# Supplementary material for: Reflux aspiration in lungs of dogs with respiratory disease and in healthy West Highland White Terriers
Source: PubMed Central journal article supplement — J Vet Intern Med. 2018 Oct 12;32(6):2074–81. doi: 10.1111/jvim.15321 (PMC6271311; doi:10.1111/jvim.15321), 2018-10-12
Supplement: JVIM-32-2074-s001.pdf [file JVIM-32-2074-s001.pdf]

**Table S1**

The dog breeds in dog groups consisting several breeds.

| <b>Group</b>                 | <b>Breeds</b>                                                                                                                                                                                                                                                                                                                |
|------------------------------|------------------------------------------------------------------------------------------------------------------------------------------------------------------------------------------------------------------------------------------------------------------------------------------------------------------------------|
| Laryngeal dysfunction (n=19) | 1 Rhodesian Ridgeback<br>1 Irish Setter<br>1 Staffordshire Terrier<br>1 French Bulldog<br>1 Miniature Schnauzer<br>1 Dachshund<br>1 German Shepherd Dog<br>1 Shetland Sheepdog<br>1 English Springer Spaniel<br>2 Labrador Retriever<br>1 Poodle<br>1 Irish Wolfhound<br>4 Mixed breed<br>1 Basset Hound<br>1 Cocker Spaniel |
| Chronic bronchitis (n=13)    | 5 Shetland Sheepdog<br>2 Chinese Crested dog<br>1 Cavalier King Charles Spaniel<br>1 Griffon<br>1 Fox Terrier<br>1 Hungarian Greyhound<br>1 Cairn Terrier<br>1 Bichon Frise                                                                                                                                                  |

|                                              |                                                                                                                                                                                                                                    |
|----------------------------------------------|------------------------------------------------------------------------------------------------------------------------------------------------------------------------------------------------------------------------------------|
| <p>Pneumonia (n=11)</p>                      | <p>1 Labrador Retriever<br/> 1 German Shepherd dog<br/> 1 Doberman<br/> 1 Bullmastiff<br/> 1 Russian Greyhound<br/> 1 Scottish Deerhound<br/> 1 Pharaon hound<br/> 2 Irish Wolfhound<br/> 1 English Bulldog<br/> 1 Mixed breed</p> |
| <p>Eosinophilic bronchopneumopathy (n=9)</p> | <p>2 Mixed breed<br/> 1 Australian Shepherd dog<br/> 1 Tibetan Mastiff<br/> 2 Finnish Lapphund<br/> 1 Border Terrier<br/> 2 Afghan hound</p>                                                                                       |
