# Supplementary material for: Reflux aspiration in lungs of dogs with respiratory disease and in healthy West Highland White Terriers
Source: PubMed Central journal article supplement — J Vet Intern Med. 2018 Oct 12;32(6):2074–81. doi: 10.1111/jvim.15321 (PMC6271311; doi:10.1111/jvim.15321), 2018-10-12
Supplement: JVIM-32-2074-s002.pdf [file JVIM-32-2074-s002.pdf]

**Table S2**

Age, sex and storage time of bronchoalveolar lavage fluid (BALF) samples and their effect on total bile acid concentrations (TBA) in different groups.

| Group                | Age (years) median, IQR and range | Sex, female/male (%) | Storage time (days) median, IQR and range | Effect of age, sex and storage time on TBA ( <i>P</i> -values) |
|----------------------|-----------------------------------|----------------------|-------------------------------------------|----------------------------------------------------------------|
| CIPF WHWTs (n=27)    | 10.9, IQR 10.2-13.1 (7.3-13.9)    | 63/37                | 2151, IQR 1106-2891 (640-3303)            | <i>P</i> =.610,<br><i>P</i> =.847,<br><i>P</i> =.243           |
| Healthy WHWTs (n=13) | 8.7, IQR 5.4-10.6 (2.8-13.8)      | 77 /23               | 2365, IQR 2518-2812 (806-2848)            | <sup>a</sup>                                                   |
| BP (n=11)            | 3.8, IQR 0.8-7.8 (0.7-11.8)       | 73 /27               | 1770, IQR 1644-2039 (1417-2046)           | <i>P</i> =.401,<br><i>P</i> =.532,<br><i>P</i> =.586           |
| IWHs (n=8)           | 6.1, IQR 3.5-7.0 (1.3-7.8)        | 63/37                | 560, IQR 403-819 (366-1178)               | <sup>b</sup>                                                   |
| CB (n=13)            | 9.3, IQR 6.7-10.5 (4.4-13.1)      | 38/62                | 1772, IQR 978-2046 (382-2927)             | <i>P</i> =.313,<br><i>P</i> =.956,<br><i>P</i> =.462           |
| EBP (n=9)            | 3.3, IQR 1.5-6.8 (1.4-8.4)        | 44/56                | 1434, IQR 1152-1927 (1044-2740)           | <i>P</i> =.624,<br><i>P</i> =.638,<br><i>P</i> =.661           |
| LD (n=19)            | 7.0, IQR 5.1-10.5 (0.8-19)        | 42/58                | 457, IQR 331-661                          | <i>P</i> =.822,                                                |

|               |                               |       |                                    |                 |
|---------------|-------------------------------|-------|------------------------------------|-----------------|
|               |                               |       | (280-2009)                         | <i>P</i> =.731, |
|               |                               |       |                                    | <i>P</i> =.486  |
| Beagles (n=6) | 4.5, IQR 4.3-4.8<br>(4.5-4.5) | 100/0 | 1976, IQR 1974-1977<br>(1974-1977) | <sup>b</sup>    |

---

<sup>a</sup>Combined with CIPF WHWTs to form WHWT group

<sup>b</sup>Not analyzed

BP, bacterial pneumonia; CB, chronic bronchitis; CIPF, canine idiopathic pulmonary fibrosis; EBP, eosinophilic bronchopneumopathy; IQR, interquartile range; IWHs, Irish Wolfhounds; LD, laryngeal dysfunction; WHWTs, West Highland White Terriers.
