# Supplementary material for: Reflux aspiration in lungs of dogs with respiratory disease and in healthy West Highland White Terriers
Source: PubMed Central journal article supplement — J Vet Intern Med. 2018 Oct 12;32(6):2074–81. doi: 10.1111/jvim.15321 (PMC6271311; doi:10.1111/jvim.15321), 2018-10-12
Supplement: JVIM-32-2074-s003.pdf [file JVIM-32-2074-s003.pdf]

**Table S3**

Correlations between total bile acid (TBA) concentrations of bronchoalveolar lavage fluid (BALF) and arterial blood gas values in dog groups where arterial blood gas analysis were available.

| Variable (mmHg)      | CIPF WHWTs (n=12) | Healthy WHWTs (n=12) | CB (n=9)    | BP (n=10)   | EBP (n=9)   |
|----------------------|-------------------|----------------------|-------------|-------------|-------------|
| PaO <sub>2</sub>     |                   |                      |             |             |             |
| median               | 64.9              | 94.1                 | 87.5        | 81.7        | 92.3        |
| range                | (34.6-93.2)       | (74.6-113)           | (68.8-99.4) | (54.2-97.3) | (84.5-109)  |
| <i>r<sub>s</sub></i> | -.51              | .10                  | .08         | -.11        | .02         |
| P(A-a)O <sub>2</sub> |                   |                      |             |             |             |
| median               | 46.2              | 19.95                | 25.5        | 30.6        | 23.2        |
| range                | (21.8-67.4)       | (10.7-38.6)          | (14.8-42.0) | (17.9-56.5) | (16.7-28.2) |
| <i>r<sub>s</sub></i> | .08               | -.16                 | .07         | -.05        | -.04        |
| PCO <sub>2</sub>     |                   |                      |             |             |             |
| median               | 29.9              | 30.2                 | 32.5        | 30.7        | 30.5        |
| range                | (25.3-35.5)       | (20.5-34.6)          | (22.9-42.9) | (22.7-35.9) | (23.2-32.5) |
| <i>r<sub>s</sub></i> | .30               | .03                  | -.13        | .29         | -.44        |

BP, bacterial pneumonia; CB, chronic bronchitis; CIPF, canine idiopathic pulmonary fibrosis; EBP, eosinophilic bronchopneumonia; P(A-a)O<sub>2</sub>, alveolar-arterial oxygen gradient; PaCO<sub>2</sub>, partial pressure of carbon dioxide; PaO<sub>2</sub>, partial pressure of oxygen; *r<sub>s</sub>*, Spearman's rank correlation coefficient; WHWTs, West-Highland White Terriers.
